# Supplementary material for: An Experimental Investigation of Viscoelastic Flow in a Contraction Channel
Source: MDPI journal article supplement (doi:10.3390/polym13111876), 2021-06-04
Supplement: s1 [file s1]

The shear and uniaxial extension viscosities of the LDPE (DSM Stamylan LD 2008 XC43) melts with various shear rates and extension rates are listed in Tables 1 and 2. These experimental data may be found on Page 108 in Verbeeten's Ph.D thesis. (Verbeeten, W.M.H. Computational Polymer Melt Rheology. Ph.D. Thesis, Technische Universiteit Eindhoven, Eindhoven, Netherlands, 2001.)

Table 1 Shear viscosities under different shear rates

| Shear rate (1/s) | Shear viscosity (Pa.s) |
|------------------|------------------------|
| 0.0304           | 4180                   |
| 0.0604           | 4070                   |
| 0.151            | 3860                   |
| 0.354            | 3560                   |
| 0.901            | 2920                   |
| 1.5              | 2840                   |
| 2.02             | 2560                   |
| 3.55             | 2130                   |
| 5.51             | 1840                   |
| 6.96             | 1910                   |
| 9.16             | 1530                   |
| 15               | 1220                   |
| 17.2             | 1250                   |
| 40.3             | 831                    |
| 80.1             | 559                    |
| 170              | 352                    |
| 421              | 218                    |
| 908              | 153                    |

Table 2 Uniaxial viscosities under different extension rates

| Extension rate (1/s) | Uniaxial viscosity (Pa.s) |
|----------------------|---------------------------|
| 0.38259              | 55530                     |
| 1.1045               | 80373                     |
| 3.763                | 67939                     |
